# Supplementary material for: Restructured GEO: restructuring Gene Expression Omnibus metadata for genome dynamics analysis
Source: Database (Oxford). 2019 Jan 16;2019:bay145. doi: 10.1093/database/bay145 (PMC6333964; doi:10.1093/database/bay145)
Supplement: Supplementary Data [file bay145_worksheet_in_restructured_geo_2017_11_6-new-bioinfo.xlsx]

## Sheet: ReGEO_test_results
GSE	Time points	correct time points	Superseries	Error in time point	Disease	Result
GSE1007	1	1	FALSE	0		dystrophin-deficient
GSE10195	1	1	FALSE	0	DOID:3393:corory artery disease;DOID:0050828:artery disease	Correct
GSE10415	1	1	FALSE	0	DOID:12849:autism	Correct
GSE11292	19	19	FALSE	0		Correct
GSE11415	9	8	FALSE	-1		Correct
GSE1173	1	1	FALSE	0		Correct
GSE12663	8	8	FALSE	0	DOID:0050535:fevr	Wrong
GSE12952	1	1	FALSE	0		Correct
GSE13435	1	1	FALSE	0		Correct
GSE13904	2	1	FALSE	-1	DOID:8828:systemic inflammatory response syndrome;DOID:225:syndrome;DOID:8828:sirs	Correct
GSE14559	1	1	FALSE	0	DOID:6652:dish	Wrong
GSE14793	1	1	FALSE	0		Correct
GSE1485	1	1	FALSE	0		Correct
GSE15280	1	1	FALSE	0		Correct
GSE15484	1	1	FALSE	0	DOID:10283:prostate cancer	Correct
GSE16269	1	1	FALSE	0		Correct
GSE17555	6	1	FALSE	-5	DOID:1967:leiomyosarcoma;DOID:0050125:dss;DOID:225:syndrome	Correct
GSE18304	1	1	FALSE	0		Correct
GSE18655	1	1	FALSE	0		prostate cancer
GSE18774	4	5	FALSE	1		Correct
GSE19216	3	1	FALSE	-2		Correct
GSE21115	1	1	FALSE	0		Correct
GSE21374	1	1	FALSE	0	DOID:576:proteinuria;DOID:1074:rel failure	Correct
GSE21991	1	1	TRUE	0		Myelodysplastic/myeloproliferative neoplasms
GSE22023	1	2	FALSE	1		Correct
GSE22561	1	1	FALSE	0		Correct
GSE22667	1	1	FALSE	0		Correct
GSE23307	1	1	FALSE	0	DOID:2377:multiple sclerosis;DOID:2237:hepatitis	Correct
GSE23384	1	1	FALSE	0	DOID:1612:breast cancer;DOID:305:carcinoma;DOID:3008:invasive ductal carcinoma	Correct
GSE23529	1	1	FALSE	0	DOID:3083:chronic obstructive pulmory disease;DOID:3083:copd;DOID:1324:lung cancer	Correct
GSE23632	1	1	FALSE	0	DOID:10992:ahl	Wrong
GSE24191	1	1	FALSE	0		Correct
GSE24287	2	1	FALSE	-1	DOID:8577:ulcerative colitis;DOID:9778:ibd;DOID:0060180:colitis;DOID:8778:crohn's disease	Correct
GSE24495	1	1	FALSE	0		Carotid plaque
GSE25465	1	1	FALSE	0	DOID:627:scid	Correct
GSE25801	1	1	FALSE	0		Correct
GSE26085	1	1	FALSE	0	DOID:8552:cml;DOID:8552:chronic myeloid leukemia;DOID:1240:leukemia;DOID:8692:myeloid leukemia	Correct
GSE26443	4	4	FALSE	0		Correct
GSE26613	1	1	FALSE	0		Correct
GSE26802	1	1	FALSE	0	DOID:4450:rcc	Wrong
GSE26932	1	1	FALSE	0		Correct
GSE27769	5	1	FALSE	-4		Correct
GSE28158	1	1	FALSE	0		Correct
GSE28253	1	1	FALSE	0	DOID:332:amyotrophic lateral sclerosis;DOID:332:als;DOID:230:lateral sclerosis	Correct
GSE28435	16	6	FALSE	-10		Correct
GSE28584	1	1	FALSE	0		Correct
GSE28750	8	1	FALSE	-7	DOID:8828:sirs	Correct
GSE29245	1	1	TRUE	0	DOID:4362:cervical cancer	Correct
GSE29536	1	1	FALSE	0	DOID:9074:systemic lupus erythematosus;DOID:399:tuberculosis;DOID:8857:lupus;DOID:848:arthritis;DOID:9074:lupus erythematosus, systemic;DOID:8857:lupus erythematosus	Correct
GSE29569	1	1	FALSE	0	DOID:10283:prostate cancer	Correct
GSE29661	1	1	FALSE	0		Correct
GSE29854	1	1	FALSE	0		Correct
GSE30032	1	1	FALSE	0	DOID:722:spontaneous abortion;DOID:3891:placental insufficiency	Correct
GSE30481	1	1	FALSE	0		Correct
GSE3127	1	1	FALSE	0		Desmoid tumors
GSE31980	3	2	FALSE	-1		Correct
GSE32075	1	1	FALSE	0		Correct
GSE33626	2	3	FALSE	1		Correct
GSE33674	5	5	FALSE	0	DOID:5327:retil detachment	Correct
GSE33770	1	1	FALSE	0		Correct
GSE33819	1	1	FALSE	0		Correct
GSE34287	1	1	FALSE	0	DOID:1289:neurodegenerative disease;DOID:4752:multiple system atrophy;DOID:678:progressive supranuclear palsy	Correct
GSE35007	1	1	FALSE	0	DOID:2355:anemia;DOID:10923:sickle cell anemia;DOID:0050639:pca	Correct
GSE35052	1	1	FALSE	0		Correct
GSE3576	1	1	FALSE	0		Correct
GSE35856	1	1	TRUE	0		Correct
GSE36128	1	1	FALSE	0		Correct
GSE36961	1	1	FALSE	0	DOID:11984:hypertrophic cardiomyopathy;DOID:0050700:cardiomyopathy	Correct
GSE37467	1	1	TRUE	0		Correct
GSE3758	1	1	FALSE	0		Correct
GSE37636	2	2	FALSE	0		Correct
GSE38770	1	1	FALSE	0		Correct
GSE38889	1	1	FALSE	0	DOID:4928:intrahepatic cholangiocarcinoma;DOID:4947:cholangiocarcinoma	Correct
GSE38956	1	1	FALSE	0	DOID:1485:cystic fibrosis	Correct
GSE39068	1	1	FALSE	0	DOID:219:colon cancer	Correct
GSE39191	1	1	FALSE	0		colorectal tumor
GSE39464	1	1	FALSE	0		Correct
GSE39603	1	1	FALSE	0	DOID:10283:prostate cancer	Correct
GSE40990	1	1	FALSE	0		Correct
GSE41627	1	1	FALSE	0	DOID:1612:breast cancer	Correct
GSE42021	1	1	FALSE	0	DOID:0110844:xp3	Wrong
GSE42747	1	1	FALSE	0		Correct
GSE42979	1	1	FALSE	0	DOID:3908:nsclc;DOID:1324:lung cancer	Correct
GSE43842	1	1	FALSE	0		Correct
GSE43909	1	1	FALSE	0	DOID:8632:kaposi's sarcoma;DOID:1115:sarcoma	GSE43909
GSE44987	3	4	FALSE	1		Correct
GSE45115	1	1	FALSE	0		Correct
GSE45304	1	1	FALSE	0	DOID:2355:anemia;DOID:5199:ureteral obstruction;DOID:13121:deficiency anemia;DOID:2355:aemia	Correct
GSE45537	1	1	TRUE	0	DOID:417:autoimmune disease	Correct
GSE45547	1	1	FALSE	0	DOID:769:neuroblastoma	Correct
GSE46022	1	1	FALSE	0	DOID:684:hepatocellular carcinoma;DOID:305:carcinoma;DOID:684:hcc	Correct
GSE46025	1	1	FALSE	0		Correct
GSE46126	1	1	FALSE	0	DOID:557:kidney disease;DOID:12155:lcm	Correct
GSE4619	1	1	FALSE	0	DOID:0060469:mds	Correct
GSE46392	1	1	FALSE	0		Correct
GSE46988	1	3	FALSE	2		Correct
GSE47456	1	1	FALSE	0		Correct
GSE47755	2	1	FALSE	-1	DOID:576:proteinuria;DOID:7728:chronic allograft arteriopathy	Correct
GSE47910	6	5	FALSE	-1		Correct
GSE4805	1	1	FALSE	0		Correct
GSE48167	3	1	FALSE	-2	DOID:10574:vitamin d deficiency	Correct
GSE4953	3	3	FALSE	0		type 1 diabete, Autoimmune disease
GSE49656	1	1	FALSE	0	DOID:4947:cholangiocarcinoma	Correct
GSE49710	5	1	FALSE	-4	DOID:769:neuroblastoma	Correct
GSE49987	29	30	FALSE	1		Correct
GSE50069	3	1	FALSE	-2	DOID:1301:hemorrhagic fever;DOID:12206:dengue hemorrhagic fever;DOID:9682:yellow fever	Correct
GSE50854	4	3	FALSE	-1		Correct
GSE50893	2	1	FALSE	-1		Correct
GSE51099	1	1	FALSE	0		Autoimmune disease
GSE51129	1	1	FALSE	0	DOID:305:carcinoma;DOID:1749:squamous cell carcinoma	Correct
GSE51710	3	3	FALSE	0		Correct
GSE52272	1	1	TRUE	0		cancer
GSE52401	1	1	FALSE	0	DOID:1324:lung cancer	Correct
GSE52491	1	1	FALSE	0		Correct
GSE53752	1	1	FALSE	0	DOID:1612:breast cancer	Correct
GSE54368	2	1	FALSE	-1	DOID:12549:hepatitis a;DOID:934:virus infection;DOID:2237:hepatitis	Correct
GSE54408	1	8	FALSE	7		Correct
GSE54628	1	1	FALSE	0		Correct
GSE54692	1	1	FALSE	0		Correct
GSE54725	1	1	FALSE	0		Correct
GSE54796	1	1	FALSE	0		Correct
GSE54891	1	1	FALSE	0	DOID:1612:breast cancer;DOID:14115:tss	Correct
GSE55276	8	9	FALSE	1		Influenza
GSE55474	1	1	TRUE	0		Correct
GSE55489	1	1	FALSE	0		hepatic steatosis
GSE55917	1	1	TRUE	0	DOID:1240:leukemia	Correct
GSE56034	1	1	FALSE	0	DOID:0050639:pca	Wrong
GSE57715	1	1	FALSE	0	DOID:1909:melanoma	Correct
GSE58000	1	1	FALSE	0		neurofibromas
GSE58249	1	1	FALSE	0	DOID:9970:obesity	Correct
GSE58453	1	1	FALSE	0		Correct
GSE59544	1	1	FALSE	0		Correct
GSE59856	1	1	FALSE	0	DOID:4607:biliary tract cancer	Correct
GSE60177	1	1	FALSE	0		Correct
GSE60909	1	1	FALSE	0		Correct
GSE61408	5	5	FALSE	0		Correct
GSE61737	1	1	FALSE	0		Correct
GSE61833	4	1	FALSE	-3		Correct
GSE62805	1	1	FALSE	0		Correct
GSE6320	5	1	FALSE	-4		Correct
GSE63350	1	1	FALSE	0		Correct
GSE64694	9	1	FALSE	-8		Correct
GSE65034	2	2	FALSE	0		Correct
GSE65771	3	3	FALSE	0	DOID:12858:huntington's disease	Correct
GSE65914	1	1	FALSE	0	DOID:37:skin disease;DOID:8881:rosacea	Correct
GSE66003	1	1	FALSE	0		Correct
GSE66499	2	1	FALSE	-1	DOID:1324:lung cancer	Correct
GSE67357	1	2	TRUE	1		Correct
GSE67490	1	1	FALSE	0		Correct
GSE67568	1	1	FALSE	0		Correct
GSE67927	1	1	FALSE	0	DOID:684:hcc	Wrong
GSE68800	1	1	FALSE	0		Glioblastoma
GSE70958	1	1	TRUE	0		Correct
GSE721	1	1	FALSE	0		Correct
GSE72858	1	1	FALSE	0		Correct
GSE73558	1	1	FALSE	0		Correct
GSE73563	1	1	TRUE	0		Correct
GSE73799	4	4	FALSE	0		Correct
GSE74143	1	1	FALSE	0	DOID:848:arthritis;DOID:7148:rheumatoid arthritis	Correct
GSE74233	1	1	FALSE	0		Correct
GSE74752	1	1	FALSE	0		Correct
GSE74843	1	1	FALSE	0		colorectal tumorsæ
GSE74999	1	1	FALSE	0	DOID:1240:leukemia	Correct
GSE7514	1	1	FALSE	0		Correct
GSE76309	1	1	FALSE	0		autoimmune cholangitis
GSE7695	1	1	FALSE	0		Correct
GSE77600	1	1	FALSE	0	DOID:8469:influenza	Correct
GSE77754	1	1	FALSE	0	DOID:1116:pertussis;DOID:1116:whooping cough	Correct
GSE77797	1	1	FALSE	0		Correct
GSE7787	1	1	FALSE	0		Correct
GSE78593	1	1	FALSE	0		Correct
GSE79159	1	1	FALSE	0		poxviruses
GSE79227	1	1	FALSE	0		Correct
GSE7941	5	5	FALSE	0		Correct
GSE79597	1	1	FALSE	0		Correct
GSE79970	1	1	FALSE	0	DOID:848:arthritis;DOID:676:juvenile idiopathic arthritis	Correct
GSE80209	1	1	FALSE	0	DOID:10283:prostate cancer;DOID:627:scid	Correct
GSE80333	1	1	FALSE	0	DOID:1612:breast cancer;DOID:305:carcinoma	Correct
GSE80651	1	1	FALSE	0		Correct
GSE8203	6	5	FALSE	-1		Correct
GSE82409	1	1	FALSE	0		Correct
GSE82432	1	1	FALSE	0		Correct
GSE82478	5	1	FALSE	-4		Correct
GSE82782	1	1	FALSE	0		Correct
GSE82793	1	1	FALSE	0		Correct
GSE83010	1	1	FALSE	0		Correct
GSE83638	1	1	FALSE	0	DOID:14791:lca	Wrong
GSE84829	1	1	FALSE	0	DOID:0050933:ovarian serous carcinoma;DOID:305:carcinoma;DOID:3114:serous carcinoma;DOID:2394:ovarian cancer	Correct
GSE85507	1	1	FALSE	0		tumor
GSE85730	1	1	FALSE	0	DOID:305:carcinoma;DOID:1749:squamous cell carcinoma;DOID:4450:rcc	Correct
GSE86641	1	1	FALSE	0		Correct
GSE8689	1	1	FALSE	0		Correct
GSE87780	1	1	FALSE	0	DOID:2935:chs	Wrong
GSE87818	2	1	FALSE	-1		Correct
GSE87849	1	1	FALSE	0		Correct
GSE9033	1	1	FALSE	0		Correct
GSE90564	1	1	FALSE	0	DOID:1612:breast cancer	Correct
GSE91047	1	1	FALSE	0	DOID:1612:breast cancer	Correct
GSE97163	1	1	FALSE	0	DOID:0050639:pca	Wrong
GSE9950	1	1	FALSE	0		Correct
